# Supplementary material for: Controllability over stressor decreases responses in key threat-related brain areas
Source: PubMed Central journal article supplement (PMC7785729; doi:10.1038/s42003-020-01537-5), 2021-01-05
Supplement: 42003_2020_1537_MOESM3_ESM.pdf [file 42003_2020_1537_MOESM3_ESM.pdf]

## **Description of Additional Supplementary Files**

File Name: Supplementary Video 1

Description: Moving-circles paradigm recently developed where two circles move around the screen, sometimes moving closer and at times moving away from each other. When the circles touch, participants are delivered a mild electric stressor. Note that circle movement, while smooth, has a high degree of unpredictability.
